# Supplementary material
Source: publisher figshare collection journal article supplement (https://wiley.figshare.com/articles/dataset/_/3564618)
Supplement: Supplementary file 1 [file 1]

APPENDIX C.

TABLE C1. The simulated maximum biomass (tons/ha) from LINKAGES II for each ecological subsection for four climate change scenarios at year 2100.

| Ecological subsection | Current climate | PCM   | CGCM  | GFDL  | Ecological subsection | Current climate | PCM   | CGCM  | GFDL  |
|-----------------------|-----------------|-------|-------|-------|-----------------------|-----------------|-------|-------|-------|
| 221Fa                 | 301.5           | 301.9 | 314.8 | 287.6 | M221Ca                | 300.4           | 298.5 | 292.5 | 289.6 |
| M221Ac                | 311.9           | 307.3 | 283.7 | 275.9 | 221En                 | 304.1           | 301.1 | 286.4 | 284.6 |
| 221Fb                 | 300.2           | 301.1 | 313.0 | 286.4 | 223Ai                 | 300.6           | 301.2 | 254.1 | 255.4 |
| 221Ea                 | 304.4           | 301.7 | 291.7 | 289.6 | 221Hb                 | 300.9           | 283.3 | 294.5 | 296.1 |
| M221Bf                | 311.1           | 308.3 | 281.8 | 275.5 | 223Ao                 | 300.3           | 303.7 | 288.8 | 265.1 |
| M221Ad                | 306.2           | 303.9 | 297.1 | 283.9 | 223Ak                 | 318.5           | 302.3 | 283.7 | 267.4 |
| 221Fc                 | 301.9           | 300.6 | 280.9 | 293.3 | M221Cb                | 303.6           | 299.4 | 301.6 | 293.6 |
| M221Bb                | 306.8           | 304.7 | 283.4 | 299.9 | 221Ej                 | 316.9           | 299.3 | 287.7 | 281.1 |
| 221Ee                 | 302.4           | 301.9 | 293.3 | 282.9 | 223Aj                 | 298.6           | 301.3 | 279.9 | 261.8 |
| 221Ed                 | 304.3           | 300.0 | 294.4 | 287.6 | 223Fc                 | 318.0           | 299.9 | 289.0 | 297.9 |
| M221Da                | 297.5           | 300.2 | 291.3 | 288.2 | 223Gb                 | 300.1           | 303.8 | 286.3 | 271.0 |
| 222Hf                 | 317.5           | 300.6 | 290.7 | 306.0 | 221Eb                 | 295.9           | 283.1 | 288.3 | 304.7 |
| 221Ec                 | 302.5           | 296.8 | 290.7 | 299.7 | M221Be                | 302.1           | 298.1 | 306.8 | 292.9 |
| 251Cd                 | 316.5           | 300.9 | 295.7 | 279.8 | 223Gd                 | 319.0           | 302.2 | 279.1 | 278.5 |
| M221Ab                | 301.4           | 302.2 | 289.2 | 287.4 | 251Eb                 | 299.0           | 298.9 | 291.5 | 273.8 |
| 221Ef                 | 300.1           | 299.2 | 303.6 | 293.2 | 223Ab                 | 299.6           | 281.5 | 223.3 | 207.3 |
| M221Aa                | 309.1           | 303.3 | 281.7 | 280.3 | 223Dc                 | 298.1           | 303.4 | 275.2 | 255.3 |
| M221Ba                | 299.4           | 296.8 | 299.6 | 298.7 | 223Ac                 | 302.1           | 299.2 | 268.2 | 255.0 |
| 221Eg                 | 299.0           | 299.5 | 299.7 | 306.1 | 223Fb                 | 317.3           | 302.3 | 291.2 | 280.1 |
| 223De                 | 318.6           | 302.3 | 289.3 | 283.8 | 223Ad                 | 305.7           | 299.1 | 270.8 | 257.0 |
| 223Gc                 | 302.2           | 304.2 | 290.7 | 293.3 | 223Ae                 | 323.1           | 295.8 | 276.1 | 255.7 |
| 223Df                 | 317.2           | 300.5 | 294.2 | 286.1 | 223Ge                 | 319.3           | 298.3 | 290.9 | 286.8 |
| 223Fe                 | 320.4           | 317.2 | 296.2 | 302.5 | 223Bd                 | 316.8           | 299.5 | 281.0 | 269.5 |
| 223Bc                 | 301.1           | 304.5 | 287.6 | 277.5 | 223Am                 | 303.4           | 299.2 | 270.5 | 258.0 |
| 223Ba                 | 324.5           | 319.2 | 291.9 | 296.2 | 221He                 | 302.2           | 298.8 | 292.2 | 294.5 |
| 222Hc                 | 321.6           | 316.9 | 287.4 | 290.9 | 223Dj                 | 298.6           | 302.9 | 289.4 | 273.8 |

| Ecological subsection | Current climate | PCM   | CGCM  | GFDL  | Ecological subsection | Current climate | PCM   | CGCM  | GFDL  |
|-----------------------|-----------------|-------|-------|-------|-----------------------|-----------------|-------|-------|-------|
| 223Dg                 | 300.4           | 302.9 | 280.5 | 271.0 | 223Fd                 | 317.8           | 300.0 | 286.6 | 279.4 |
| 223Aq                 | 297.4           | 303.2 | 278.4 | 261.2 | 223Ff                 | 320.0           | 302.1 | 290.8 | 297.8 |
| 223Eb                 | 301.5           | 298.8 | 285.2 | 277.0 | 223Ga                 | 319.4           | 299.0 | 290.0 | 278.7 |
| 223Ea                 | 297.0           | 300.8 | 278.0 | 261.0 | M221Bc                | 301.9           | 300.8 | 288.1 | 298.4 |
| 223Bb                 | 299.8           | 303.7 | 272.6 | 262.2 | 251Ea                 | 302.6           | 299.0 | 285.2 | 270.5 |
| 223Dd                 | 299.2           | 304.4 | 232.7 | 245.0 | 223Ap                 | 301.3           | 300.4 | 292.0 | 275.8 |
| 231Hf                 | 305.6           | 288.4 | 208.8 | 262.4 | M221Bd                | 305.8           | 300.4 | 287.4 | 283.0 |
| 223Eh                 | 299.8           | 299.9 | 271.4 | 251.4 | 223Fa                 | 298.1           | 292.2 | 267.5 | 248.6 |
| 234Da                 | 305.8           | 314.6 | 235.1 | 268.6 | 223Db                 | 300.5           | 320.9 | 242.3 | 270.3 |
| 231Hg                 | 300.0           | 314.7 | 246.6 | 258.4 | 223Aa                 | 319.9           | 297.0 | 284.8 | 265.3 |
| 223Eg                 | 297.3           | 294.3 | 242.5 | 215.2 | 223Da                 | 299.9           | 317.4 | 244.2 | 257.9 |
| 234Dc                 | 304.5           | 287.0 | 218.2 | 248.9 | 223Dh                 | 297.7           | 302.0 | 279.9 | 266.5 |
| 231He                 | 300.8           | 306.3 | 245.7 | 255.5 | 223Al                 | 297.7           | 302.7 | 283.5 | 250.4 |
| 223Ag                 | 299.0           | 301.2 | 244.3 | 221.9 | 223Af                 | 299.8           | 298.6 | 278.4 | 249.5 |
| 234Db                 | 300.6           | 301.8 | 234.2 | 237.5 | 221Hc                 | 301.0           | 303.7 | 286.4 | 280.6 |
| 223Ec                 | 302.0           | 316.6 | 277.1 | 265.6 | 223Di                 | 298.3           | 302.9 | 280.6 | 271.3 |
| 223Ah                 | 300.9           | 297.3 | 256.1 | 237.9 | 231Cd                 | 311.9           | 286.2 | 203.5 | 197.2 |
| 223An                 | 298.5           | 289.6 | 229.0 | 188.7 | 223Ee                 | 294.6           | 287.8 | 245.2 | 227.8 |
| M223Aa                | 297.6           | 305.9 | 268.3 | 226.4 | 223Ef                 | 289.9           | 283.6 | 225.8 | 246.0 |
| 223Ed                 | 300.0           | 312.0 | 247.4 | 259.6 | M231Ab                | 294.2           | 272.8 | 172.6 | 153.1 |
| M223Ab                | 296.0           | 300.9 | 244.2 | 217.4 | M231Ac                | 286.1           | 284.2 | 182.0 | 148.7 |
| 231Gc                 | 278.9           | 284.7 | 160.6 | 137.8 | 231Ce                 | 291.9           | 289.8 | 206.2 | 201.3 |
| 231Ga                 | 283.7           | 264.8 | 175.9 | 173.9 |                       |                 |       |       |       |
| 231Gb                 | 316.1           | 281.7 | 200.4 | 191.4 |                       |                 |       |       |       |
| 231Be                 | 291.7           | 281.7 | 181.0 | 170.8 |                       |                 |       |       |       |
| M231Aa                | 283.7           | 281.5 | 158.9 | 147.6 |                       |                 |       |       |       |
